# Supplementary material for: Facile Fabrication of Porous MoSe2/Carbon Microspheres via the Aerosol Process as Anode Materials in Potassium-Ion Batteries
Source: MDPI journal article supplement (doi:10.3390/batteries10010025), 2024-01-09
Supplement: s1 [file s1]

# Supplementary Material

## **A facile fabrication of porous MoSe<sub>2</sub>/carbon microspheres via the aerosol process as anode materials in potassium-ion batteries**

Du Yeol Jo<sup>a</sup> and Seung-Keun Park<sup>a,b,c\*</sup>

<sup>a</sup>Department of Advanced Materials Engineering, Chung-Ang University, 4726, Seodong-daero, Daedeok-myeon, Anseong, Gyeonggi-do 17546, Republic of Korea

<sup>b</sup>Department of Intelligent Energy and Industry, Chung-Ang University, 84 Heukseok-ro, Dongjak-gu, Seoul, 06974, Republic of Korea

<sup>c</sup>Western Seoul Center, Korea Basic Science Institute, 150 Bugahyeon-ro, Seodaemun-gu, Seoul, 03759, Republic of Korea

\*Corresponding Author. Email address: [skpark09@cau.ac.kr](mailto:skpark09@cau.ac.kr) (S.-K. Park)

**This file includes:**

- XRD patterns of p-MoSe<sub>2</sub>@C MS and MoSe<sub>2</sub>@C MS.
- TG curve of p-MoSe<sub>2</sub>@C MS.
- Raman spectra of p-MoSe<sub>2</sub>@C MS.
- CV curves of MoSe<sub>2</sub>@C MS electrodes.
- Randle-type circuit model.
- The initial galvanostatic charge-discharge curves of p-MoSe<sub>2</sub>@C MS and MoSe<sub>2</sub>@C MS electrodes.
- SEM images after 200 cycles of p-MoSe<sub>2</sub>@C MS and MoSe<sub>2</sub>@C MS electrodes.

## 1. *Characterization*

The morphological and structural characteristics of the synthesized composites were investigated by field emission scanning electron microscopy (FE-SEM, using a HITACHI S-4300) and field emission transmission electron microscopy (FE-TEM, using a JEM-2100F, at the Korea Basic Science Institute in Daegu). Powder X-ray diffraction (XRD) patterns were recorded with an X'Pert PRO diffractometer using Cu-K $\alpha$  radiation (wavelength = 1.5418 Å) at the same institute in Daegu. The carbon content in the composites was quantified using a Pyris 1 thermogravimetric (TG) analyzer (Perkin Elmer), which operates over a temperature spectrum of 25-700 °C at a heating rate of 10 °C per minute in an air environment. In addition, X-ray photoelectron spectroscopy (XPS) was used to determine the chemical composition and oxidation states within the composites using a K-alpha<sup>+</sup> model equipped with an Al K $\alpha$  monochromator. Raman spectroscopy (using a Horiba JY HR LabRam800) was used to study the carbon structures in the composites. In addition, the pore sizes and surface areas of the materials were determined using the Brunauer-Emmett-Teller (BET) technique with pure nitrogen gas as the adsorbent.

## 2. *Electrochemical measurement*

The electrochemical behavior of the p-MoSe<sub>2</sub>@C MS electrodes was evaluated using a conventional 2032-type coin cell setup. To prepare the KIB anodes, the active material was combined with carbon black (Super P) and carboxymethyl cellulose (CMC) in a weight ratio of 7:2:1 in deionized water. This mixture was then spread evenly over a copper foil. The coin cell assembly was performed in a controlled environment in a glove box. It consisted of potassium metal as the counter electrode, a glass filter as the separator, and a 3 M solution of potassium bis(fluorosulfonyl)imide (KFSI) in anhydrous diethylene glycol dimethyl ether as the electrolyte. Charge and discharge characteristics and cyclic voltammetry (CV) tests were performed on a battery analyzer (WonATech, WBCS3000L) operating over a voltage range of 0.01-3.0 V at various current densities. In addition, electrochemical impedance spectroscopy (EIS) measurements were performed on the coin cells over a frequency range of 0.1-100 kHz.

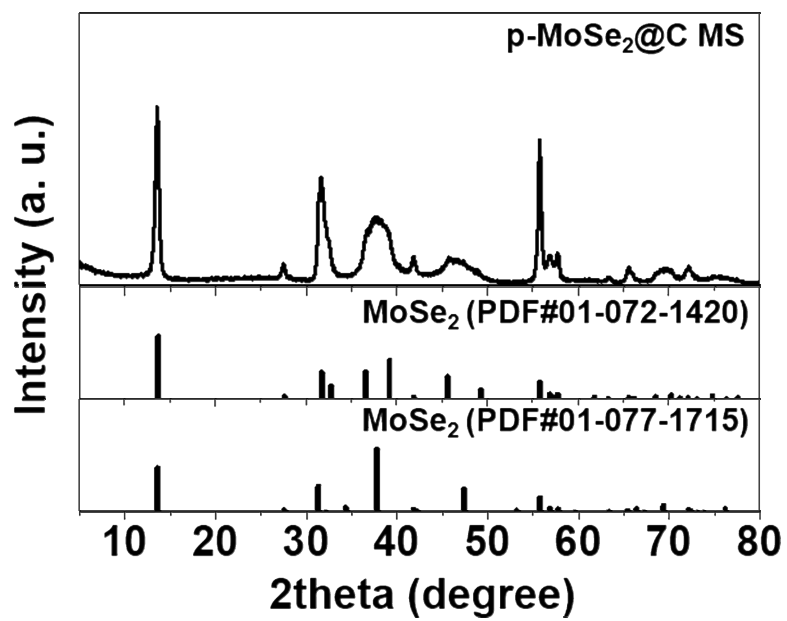

**Figure S1.** XRD patterns of p-MoSe<sub>2</sub>@C MS and MoSe<sub>2</sub>@C MS.

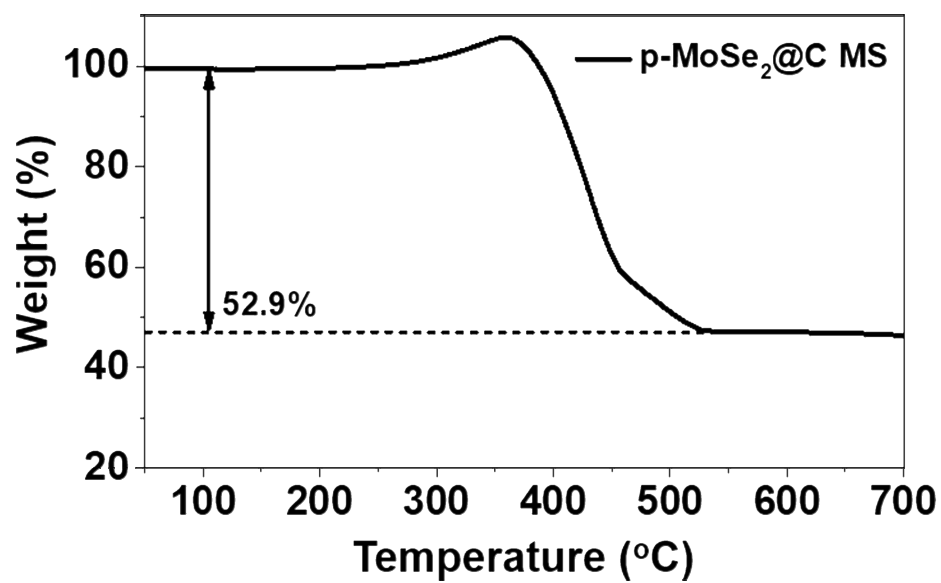

**Figure S2.** TG curve of p-MoSe<sub>2</sub>@C MS.

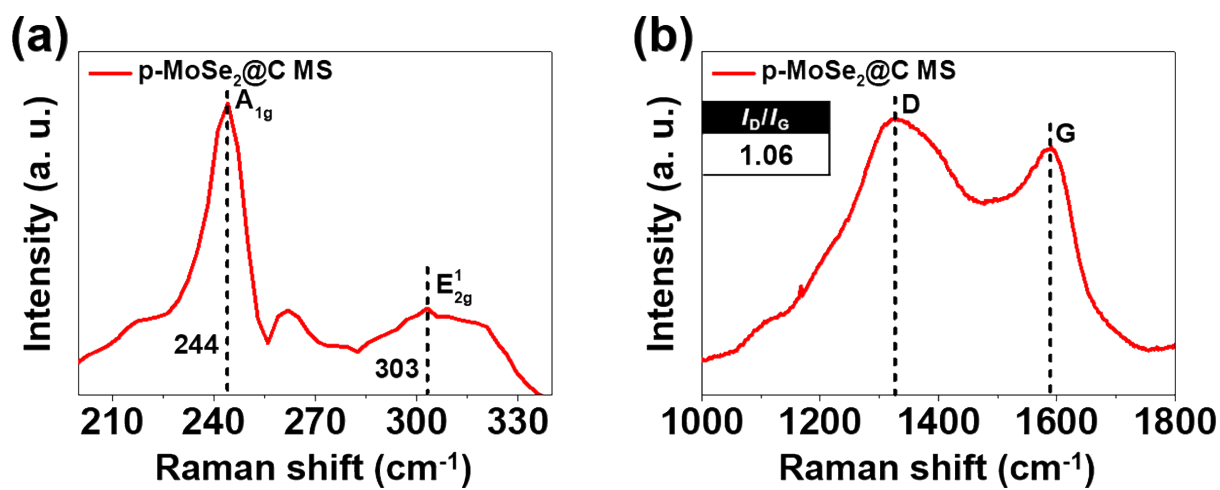

Figure S3. Raman spectra of p-MoSe<sub>2</sub>@C MS.

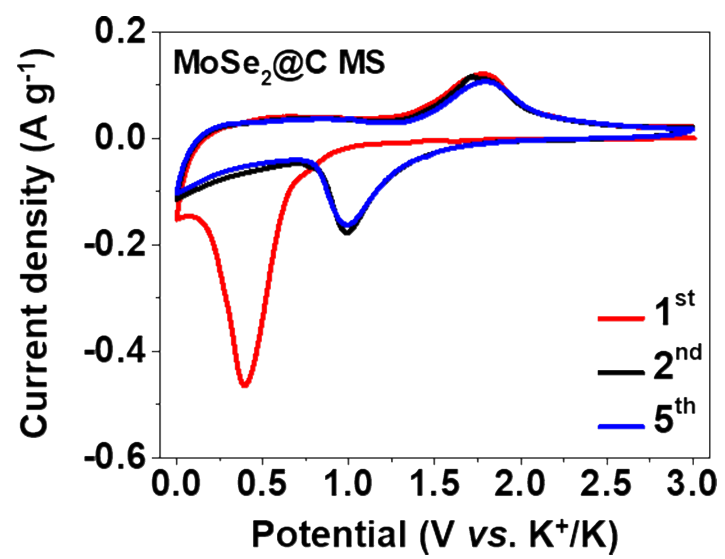

**Figure S4.** CV curves of MoSe<sub>2</sub>@C MS electrodes.

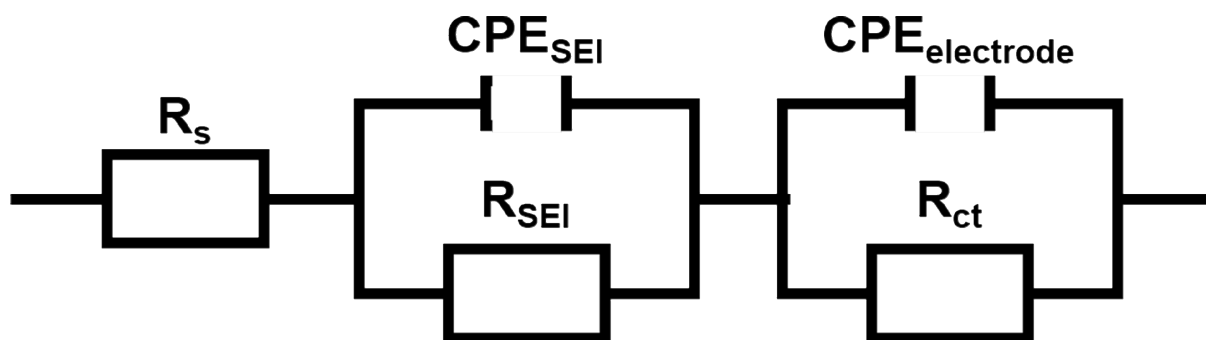

**Figure S5.** Randle-type circuit model.



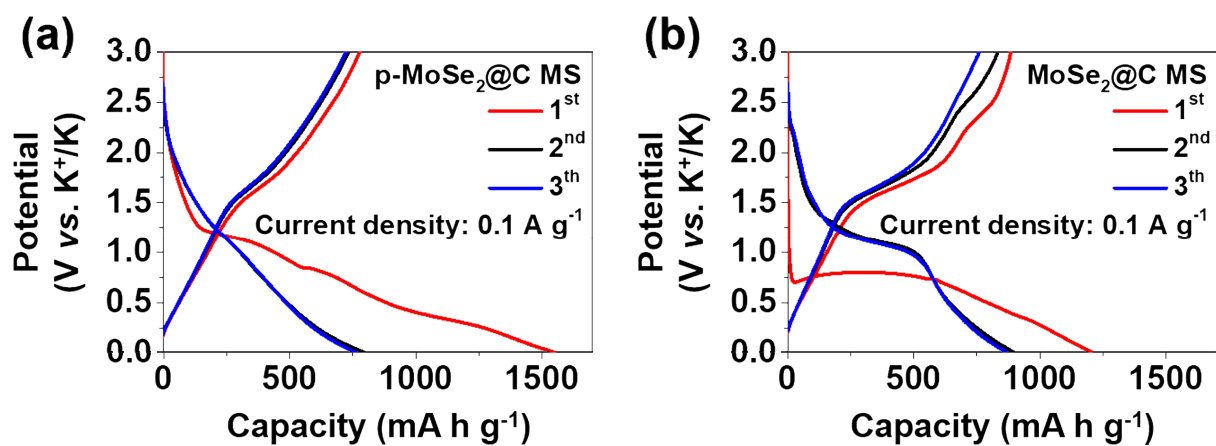

**Figure S6.** The initial galvanostatic charge-discharge curves of p-MoSe<sub>2</sub>@C MS and MoSe<sub>2</sub>@C MS electrodes.

After 200 cycles

**p-MoSe<sub>2</sub>@C MS**

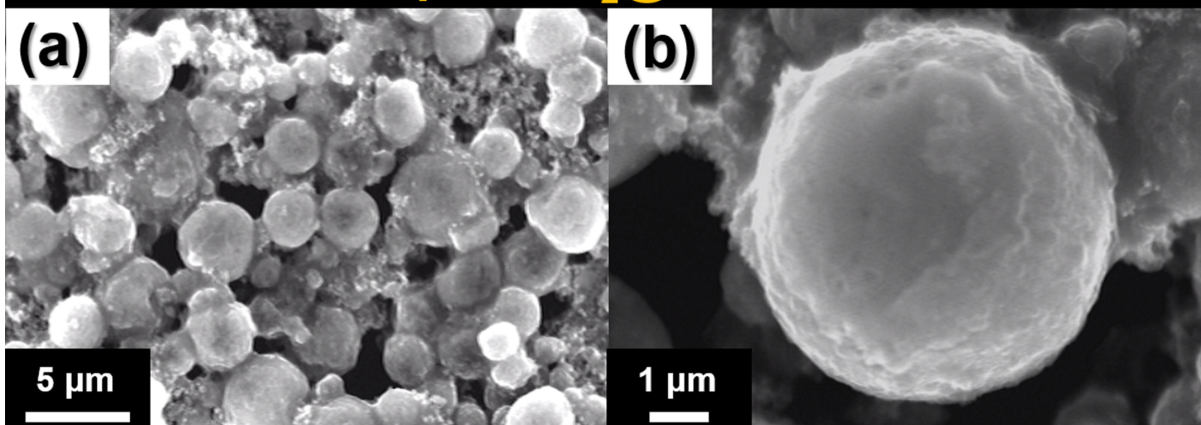

**MoSe<sub>2</sub>@C MS**

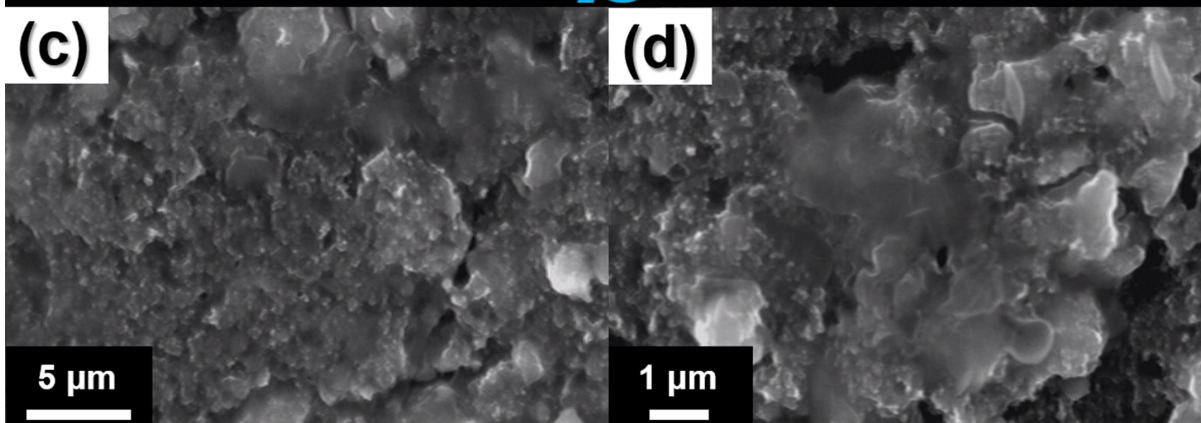

**Figure S7.** SEM images after 200 cycles of p-MoSe<sub>2</sub>@C MS and MoSe<sub>2</sub>@C MS electrodes.

**Table S1.** Electrochemical properties of various nanostructured Mo-based anode materials for potassium-ion batteries reported in the previous literatures.

| Sample                         | Synthesis method                           | Voltage window [V] | Current density [mA g <sup>-1</sup> ] | Discharge capacity [mA h g <sup>-1</sup> ] (Cycle) | Ref.            |
|--------------------------------|--------------------------------------------|--------------------|---------------------------------------|----------------------------------------------------|-----------------|
| <b>p-MoSe<sub>2</sub>@C MS</b> | <b>Spray-drying method</b>                 | <b>0.01-3.0</b>    | <b>500</b>                            | <b>300 (300<sup>th</sup>)</b>                      | <b>Our work</b> |
| MoSe <sub>2</sub> /C-700       | Electrospinning                            | 0.01-3.0           | 100                                   | 316 (100 <sup>th</sup> )                           | [S1]            |
| MoSe <sub>2</sub> /N-C-2       | Biomass adsorption method                  | 0.01-3.0           | 100                                   | 240 (100 <sup>th</sup> )                           | [S2]            |
| 2H-MoS <sub>2</sub> /CNC       | Grinding-promoted intercalated exfoliation | 0.01-2.5           | 200                                   | 203 (300 <sup>th</sup> )                           | [S3]            |
| MoSe <sub>2</sub> @NCNT        | Hydrothermal method                        | 0.01-3.0           | 100                                   | 247 (100 <sup>th</sup> )                           | [S4]            |
| MoSe <sub>2</sub> ⊂PNC-HNTs    | low-temperature solution-phase method      | 0.01-3.0           | 100                                   | 260 (200 <sup>th</sup> )                           | [S5]            |
| MoS <sub>2</sub> @C            | Three-roll milling                         | 0.01-3.0           | 500                                   | 241 (100 <sup>th</sup> )                           | [S6]            |

## REFERENCES

1. Shen, Q.; Jiang, P.; He, H.; Chen, C.; Liu, Y.; Zhang, M. Encapsulation of MoSe<sub>2</sub> in Carbon Fibers as Anodes for Potassium Ion Batteries and Nonaqueous Battery–Supercapacitor Hybrid Devices. *Nanoscale* **2019**, *11*, 13511-13520.
2. Lei, Z.; Li, X.; Liu, Y.; Wu, J.; Wang, Y.; Luo, Y.; Chen, Q.; Wei, M.; Zeng, L.; Qian, Q. Two-Dimensional MoSe<sub>2</sub>/Chitosan-Derived Nitrogen-Doped Carbon Composite Enabling Stable Sodium/Potassium Storage. *J. Phys. Chem. Solids* **2022**, *163*, 110573.
3. Wang, H.; Niu, J.; Shi, J.; Lv, W.; Wang, H.; van Aken, P.A.; Zhang, Z.; Chen, R.; Huang, W. Facile Preparation of MoS<sub>2</sub> Nanocomposites for Efficient Potassium-Ion Batteries by Grinding-Promoted Intercalation Exfoliation. *Small* **2021**, *17*, 2102263.
4. Li, N.; Sun, L.; Wang, K.; Zhang, J.; Liu, X. Anchoring MoSe<sub>2</sub> Nanosheets on N-Doped Carbon Nanotubes as High Performance Anodes for Potassium-Ion Batteries. *Electrochim. Acta* **2020**, *360*, 136983.
5. Li, B.; Liu, Y.; Li, Y.; Jiao, S.; Zeng, S.; Shi, L.; Zhang, G. Dual-Functional Template-Directed Synthesis of MoSe<sub>2</sub>/Carbon Hybrid Nanotubes with Highly Disordered Layer Structures as Efficient Alkali-Ion Storage Anodes beyond Lithium. *ACS Appl. Mater. Interfaces* **2020**, *12*, 2390-2399.
6. Chen, L.; Chen, Z.; Chen, L.; Zhou, P.; Wang, J.; Yang, H.; Feng, Z.; Li, X.; Huang, J. The Exfoliation of Bulk MoS<sub>2</sub> by a Three-Roller Mill for High-Performance Potassium Ion Batteries. *Appl. Surf. Sci.* **2023**, *615*, 156253.
