# Supplementary material for: Facile Fabrication of Porous MoSe2/Carbon Microspheres via the Aerosol Process as Anode Materials in Potassium-Ion Batteries
Source: MDPI journal article supplement (doi:10.3390/batteries10010025), 2024-01-09
Supplement: s1 [file s1]

Archive with 1 entries (1 files):
- batteries-2771685-supplementary.pdf
